# Supplementary material
Source: PubMed Central journal article supplement (PMC10239023)
Supplement: NIHMS1900529-supplement-supplement.pdf [file NIHMS1900529-supplement-supplement.pdf]

## Supplementary Appendix

Supplement to: Lisco A, Ortega-Villa AM, Mystakelis H, et al. Reappraisal of idiopathic CD4 lymphocytopenia at 30 years. *N Engl J Med* 2023;388:1680-91. DOI: 10.1056/NEJMoa2202348

This appendix has been provided by the authors to give readers additional information about the work.

# **Supplementary Appendix**

## **Idiopathic CD4 Lymphocytopenia at 30: A reappraisal**

Andrea Lisco, Ana M. Ortega-Villa, Harry Mystakelis, Megan V. Anderson, Allyson Mateja, Elizabeth Laidlaw, Maura Manion, Gregg Roby, Jeanette Higgins, Safia Kuriakose, Magdalena A. Walkiewicz, Morgan Similuk, Jennifer W. Leiding, Alexandra F. Freeman, Virginia Sheikh, Irimi Sereti

## **Table of Contents**

|                                      |                |
|--------------------------------------|----------------|
| <b>1. Supplementary Methods.....</b> | <b>page 3</b>  |
| <b>2. Supplementary Figures</b>      |                |
| - <b>Figure S1.....</b>              | <b>page 9</b>  |
| - <b>Figure S2.....</b>              | <b>page 10</b> |
| <b>3. References.....</b>            | <b>page 11</b> |

## 1        **1. Supplementary Methods**

### 3        **Study Cohort:**

4        Participants were enrolled in the prospective protocol “Etiology, pathogenesis and natural history  
5        of patients with idiopathic CD4 lymphopenia” (NCT00867269) between January 2009 and  
6        March 2020. All participants signed informed consent before any study procedures.

7        The protocol participants had to travel to the NIH Clinical Center for their study visits. Eligible  
8        participants were adults with confirmed ICL (CD4<sup>+</sup>T-cell count <300 cells/μl or <20% of total T  
9        lymphocytes at the time of screening and on at least 2 occasions at least 6 weeks apart in the  
10       absence of any illness, treatment, or condition accounting for CD4 lymphopenia. Ongoing care  
11       by a referring primary care physician and willingness to allow storage of blood and tissue  
12       samples for future analysis were additional inclusion criteria. Exclusion criteria were defined as  
13       HIV-1/2, HTLV-1/2 infection as per serological/molecular testing; any known acquired  
14       immunodeficiency or clinical condition associated with persistent lymphopenia; any inborn error  
15       of immunity (IEI) based on the 2022 International Union of Immunological Societies (IUIS)  
16       genotypic-phenotypic classification<sup>1</sup>; active malignancy at screening; any medication or  
17       biologic/herbal substances known to cause lymphopenia.

18       The screening visit included a clinical and laboratory assessment with the following study  
19       procedures: complete history and physical examination, utilizing standard intake evaluation as  
20       specified in the attached clinical protocol; acquisition of any available clinical, radiological,  
21       microbiological and cytological/histological records of previous infectious complications; and  
22       rheumatologic evaluation by the NIH Rheumatology consult service including a structured  
23       physical examination and review of symptoms. Dermatology, pulmonary, ophthalmology, and  
24       other consultations (i.e. endocrinology, gynecology) by the NIH consult services were obtained

1 as medically indicated based on initial history and physical examination. Screening laboratory  
2 testing included the following: HIV serology and viral load, hepatitis B and C, and HTLV-I and  
3 II serologies, and Hepatitis B antigen; Diphtheria and tetanus antibody titers; Other infectious  
4 serologies, including Cytomegalovirus (CMV), Epstein-Barr Virus (EBV), Herpes Simplex  
5 Virus I and II, and Varicella Zoster Virus; CMV/EBV blood plasma PCR; Urine histoplasma  
6 antigen; Serum cryptococcal antigen; Complete blood count (CBC) and differential; PT/PTT;  
7 biochemical profile; quantitative immunoglobulins; TSH, Total Complement, C3/C4.;  
8 Erythrocyte sedimentation rate (ESR), d-Dimer, and CRP; Urinalysis, urine pregnancy test  
9 (female patients of childbearing age).  
10 Autoantibodies profiling with Anti-ds DNA Antibody, Anti-Cardiolipin Antibody, Anti-Thyroid  
11 Panel, Anti-Nuclear Antibody, Rheumatoid Factor, Anti-ENA Screen, Lupus Anticoagulant,  
12 Beta 2 Glycoprotein and Anti-CCP Antibody. Lymphocyte immunophenotyping (CD4-T cells,  
13 CD8-T cells, B-cells, NK-cells); HLA testing; T-cell receptor gene rearrangement and  
14 Immunoglobulin gene rearrangements by PCR; Splenic ultrasounds; Genetic screening by  
15 targeted gene panel or whole exome sequencing. Other radiological or laboratory studies as well  
16 as invasive procedures (i.e. bone marrow biopsy, skin or core lymph node biopsy) were done as  
17 directed by study and clinical findings.

18 The follow-up visits included a clinical and laboratory assessment with the following  
19 study procedures: complete history and physical examination; and evaluations by the NIH sub-  
20 specialty consult services as medically indicated based on initial and follow-up history and  
21 physical examination. Follow-up laboratory testing included the following: HIV serology and  
22 viral load; Urine histoplasma antigen; Serum cryptococcal antigen; CMV/EBV PCR; CBC with  
23 differential; PT/PTT; Biochemical profile; TSH; Quantitative immunoglobulins; Urinalysis and

1 urine pregnancy test (female patients of child-bearing age/ability); Autoantibodies (as listed  
2 above in screening visit). Any other radiological or laboratory studies as well as invasive  
3 procedures (i.e. bone marrow biopsy, skin or core lymph node biopsy) were done as directed by  
4 study and clinical findings.

5         Some enrolled study participants were subsequently excluded if a specific diagnosis of  
6 the CD4 lymphopenia was confirmed during follow-up. Except for the qualitative serological  
7 response to SARS-COV2 immunizations, all other clinical and immunological data were  
8 censored in March 2020, since thereafter regular protocol visits to the NIH Clinical Center were  
9 interrupted by the COVID-19 pandemic and have not yet been fully restored since. Follow-up  
10 data on the qualitative serological response to Severe Acute Respiratory Syndrome Coronavirus  
11 2 (SARS-CoV2) immunizations were censored in October 2021.

12

### 13 **Immunological Evaluations:**

14 **Immunological evaluation.** Immunophenotyping was performed in a Clinical Laboratory  
15 Improvement-certified laboratory to enumerate CD4, CD8 T, B lymphocytes, and NK cells in  
16 peripheral blood. Immunophenotyping of peripheral blood mononuclear cells was performed  
17 staining cells with monoclonal antibodies from BD Biosciences (San Jose, CA) and analyzed  
18 immediately on a Becton Dickinson FACSCanto flow cytometer (BD Biosciences, San Jose,  
19 CA). SARS-CoV2 serological response in 22 ICL patients was evaluated in patients either seen  
20 at the NIH Clinical Center for clinical indications or who provided the results of commercial  
21 serological testing by the Elecsys® (Roche Diagnostics) assay.

22

### 23 **Genetic work up:**

1 84 of the 108 study participants underwent genetic analysis by whole exome sequencing (80  
2 patients) or targeted gene panel sequencing (4 patients) under the NIH internal Review Board  
3 approved protocols “Etiology, pathogenesis and natural history of patients with idiopathic CD4  
4 lymphopenia” (NCT00867269) and/or the “NIAID Centralized Sequencing Protocol  
5 (NCT03206099).

6

### 7 **Statistical Analysis:**

8 For descriptive statistics the median with 25%-75% interquartile ranges are reported.

9 Two-tailed nonparametric tests were used to compare ranks or differences between groups. To  
10 assess the potential prognostic value of T cell counts, we used the T cell tertiles<sup>2</sup>, for CD4 the  
11 cutoff points were 43 and 128, for CD8 the cutoff points were 91 and 234, and for NK the cutoff  
12 points were 120 and 167, using the highest tertile as reference.

13 The tertiles were calculated from the baseline (screening visit) measurement of all  
14 participants with the goal of evaluating whether being in a particular tertile was associated with  
15 higher or lower odds of presenting a condition (OIs, cancer, autoimmunity) via logistic  
16 regression with Firth’s bias reduction. Because logistic regression is meant for independent data,  
17 we used multiple outputation which allowed us to apply a method designed for independent data,  
18 in a setting where we have multiple cell counts per participant (longitudinal data). Here, cell  
19 counts represent either CD4-, CD8-, or NK-cells, as we evaluated them separately. Briefly, in  
20 multiple outputation, an observation (cell count at a particular visit) from each participant is  
21 randomly selected and Firth’s logistic regression is implemented. This procedure is repeated  
22 multiple times. During each iteration for the selected observation, the binary condition is the  
23 response, the covariate of interest is a variable determining the observed tertile (lowest – tertile

1 1, middle – tertile 2, highest – tertile 3) based on where the selected observed cell count lies in  
2 comparison with the baseline tertiles, adjusted for age and gender at baseline. To calculate the  
3 effect estimate the average of all estimates is used, and to calculate the effect estimate variance,  
4 the average of the estimated variances minus the sample variance of the effect estimate is used.  
5 The opportunistic infections of clinical significance were: cryptococcosis, histoplasmosis,  
6 disseminated or pulmonary non-tubercular mycobacterial infections, severe HPV-related  
7 diseases (anogenital dysplasia requiring surgical management, recurrent skin warts refractory to  
8 therapeutic interventions, combined mucosal and skin HPV-related diseases irrespective of  
9 presence of dysplasia), complicated or disseminated VZV infections, complicated or  
10 disseminated oral or anogenital herpetic infections, malignancies associated with oncogenic viral  
11 infections (i.e. HPV, HHV-8, EBV), molluscum contagiosum, CMV end-organ disease,  
12 *Pneumocystis Jirovecii* pneumonia, coccidioidomycosis, Progressive Multifocal Encephalitis  
13 (PML). General infectious complications were categorized as the above-mentioned conditions as  
14 well as dermatomal and uncomplicated zoster, localized and uncomplicated oral or anogenital  
15 herpetic infections, HPV-related anogenital lesions without evidence of dysplasia on  
16 biopsy/colposcopy spontaneously resolving or not recurring after 1 medical or surgical treatment,  
17 as well as skin warts spontaneously resolving or responsive to therapy. Longitudinal linear-  
18 mixed models were used to evaluate the longitudinal trajectories of CD4 and CD8 T cell counts  
19 over time.

20 The expected death rate was calculated from the CDC national death rate broken down by  
21 age, sex, race and ethnicity<sup>3</sup>. To get the probability of each person dying during the study, we  
22 determined the national death rate matching their gender, age, race, and ethnicity for each year  
23 they were in the study. To determine the expected number of patients who would have died during



1 follow-up had they been healthy, we summed all subjects' probability of death during the study.  
2 We used a one-sided Poisson test to determine if the number of deaths in our cohort is significantly  
3 larger than the expected count.  
4 Using the SEER Cancer Statistics Review (CSR)<sup>4,5</sup>, we obtained the prevalence percent of the  
5 different invasive cancer types in the ICL cohort by gender (all races). Prevalence percent not  
6 shown in SEER due to there being fewer than 5 cases were assumed to be 0. Only invasive cancers  
7 diagnosed within the previous 25 years were included in the analysis, and all invasive cancers were  
8 assumed to be prevalent cancers, regardless of when they developed. We assumed the SEER  
9 prevalence as of January 1, 2017, was the same as at the end of the study follow-up period. For  
10 each invasive cancer type and for each subject, we determined whether that subject was diagnosed  
11 with that cancer, as well as the SEER prevalent percent using the gender and age for that subject  
12 at the end of the follow-up period. For each invasive cancer type, we summed the total number of  
13 subjects with that cancer and the total prevalent percent for that cancer. We compared them using  
14 a one-sided Poisson test to determine the probability of observing as many or greater than the  
15 number of cases in our cohort, assuming that the true rate is the sum of prevalent percentages. *p*-  
16 values less than 0.05 was considered significant.

17

18

19

20

1 **Figure S1: Immune response to SARS-Cov2 vaccines in ICL.**

2

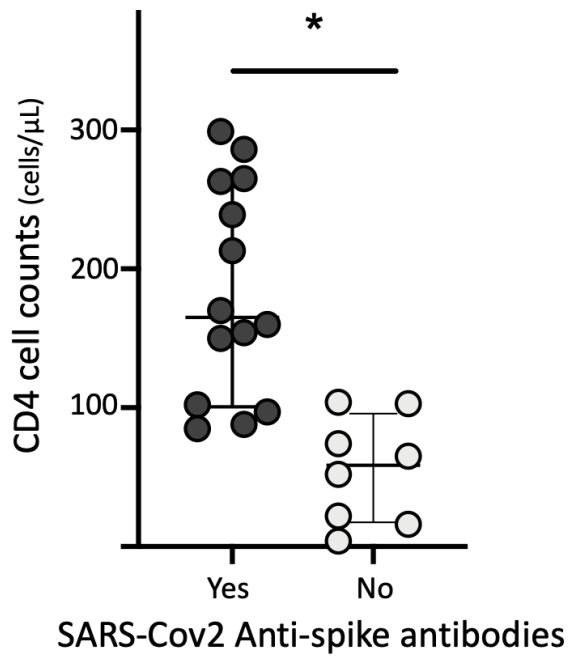

3

4

5 Absolute CD4 cell counts in ICL patients with or without detectable anti-Spike antibodies after 2  
6 doses of mRNA vaccines. \* Denotes a statistically significant difference.

7

8

1 **Figure S2: Sensitivity analysis for the association between CD4 cell counts and**  
 2 **opportunistic infections of clinical significance (OIs), cancers and autoimmune diseases.**

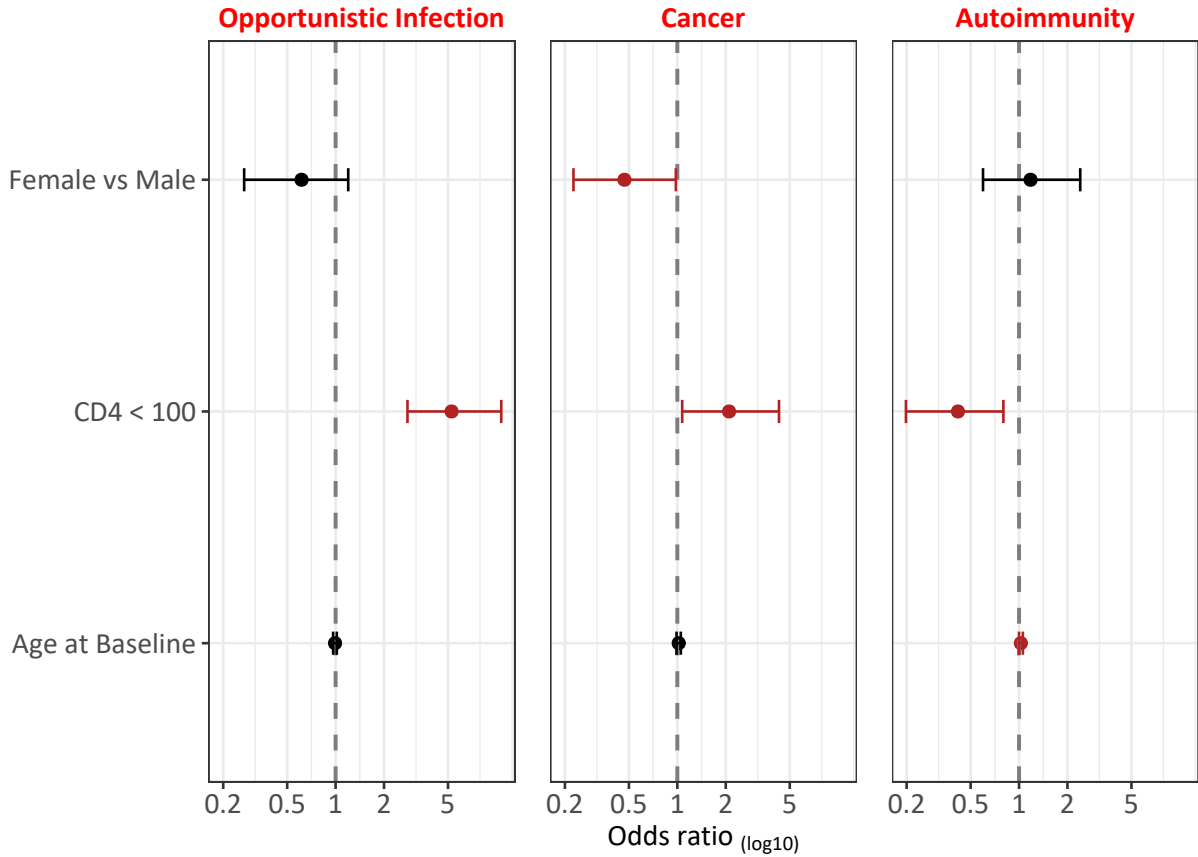

3  
 4  
 5  
 6  
 7  
 8  
 9

Odds ratios (ORs) and 95% confidence intervals for OI, cancer, or autoimmune disease of CD4 cell count <100 vs.  $\geq 100$  cells/ $\mu$ L (a pre-established cutoff), adjusted for age and sex. In red, the ORs for which the 95% confidence intervals exclude the null value of 1.

1 **References**

- 2
- 3 1. Tangye SG, Al-Herz W, Bousfiha A, et al. Human Inborn Errors of Immunity: 2022  
4 Update on the Classification from the International Union of Immunological Societies  
5 Expert Committee. *J Clin Immunol* 2022;42(7):1473-1507. DOI: 10.1007/s10875-022-  
6 01289-3.
- 7
- 8 2. Kuller LH, Tracy R, Bellosso W, et al. Inflammatory and coagulation biomarkers and  
9 mortality in patients with HIV infection. *PLoS Med* 2008;5(10):e203. DOI:  
10 10.1371/journal.pmed.0050203.
- 11
- 12 3. Centers for Disease Control and Prevention, National Center for Health Statistics.  
13 Compressed Mortality File 1999-2016 CDC WONDER Online Database.
- 14
- 15 4. Mayor PC, Eng KH, Singel KL, et al. Cancer in primary immunodeficiency diseases:  
16 Cancer incidence in the United States Immune Deficiency Network Registry. *J Allergy*  
17 *Clin Immunol* 2018;141(3):1028-1035. DOI: 10.1016/j.jaci.2017.05.024.
- 18
- 19 5. Institute NC. Surveillance, Epidemiology, and End Results (SEER) Program  
20 ([www.seer.cancer.gov](http://www.seer.cancer.gov)) SEER\*Stat Database: Incidence - SEER Research Data, 9  
21 Registries. Nov 2021 (1975-2019).
- 22
